# Supplementary material
Source: publisher figshare collection journal article supplement (https://sage.figshare.com/ndownloader/files/14005337)
Supplement: Supplementary file 1 [file 14005337]

Code#

### Riparian Buffer Short Survey

Q1. How interested are you in learning more about riparian buffers?  
(Please check one box only)

|                          |                          |                          |                          |
|--------------------------|--------------------------|--------------------------|--------------------------|
| Very Uninterested        | Uninterested             | Interested               | Very Interested          |
| <input type="checkbox"/> | <input type="checkbox"/> | <input type="checkbox"/> | <input type="checkbox"/> |

Q2. Would you say a riparian buffer is needed on any part of your property?  
(Please check one box only)

|                          |                          |                          |                          |
|--------------------------|--------------------------|--------------------------|--------------------------|
| Definitely No            | Probably No              | Probably Yes             | Definitely Yes           |
| <input type="checkbox"/> | <input type="checkbox"/> | <input type="checkbox"/> | <input type="checkbox"/> |

Q3. Would you be willing to install a riparian buffer on your property at any point in the future?  
(Please check one box only)

|                          |                          |                          |                          |
|--------------------------|--------------------------|--------------------------|--------------------------|
| Definitely No            | Probably No              | Probably Yes             | Definitely Yes           |
| <input type="checkbox"/> | <input type="checkbox"/> | <input type="checkbox"/> | <input type="checkbox"/> |

*Thank you for your participation!*

*Please return the survey in the postage-paid envelope provided.*
